# Supplementary material for: YY1-induced DLEU1/miR-149-5p Promotes Malignant Biological Behavior of Cholangiocarcinoma through Upregulating YAP1/TEAD2/SOX2
Source: PubMed Central journal article supplement (PMC9295058; doi:10.7150/ijbs.66224), 2022-07-04
Supplement: ijbsv18p4301s1.pdf [file ijbsv18p4301s1.pdf]

### Supporting Figure S1

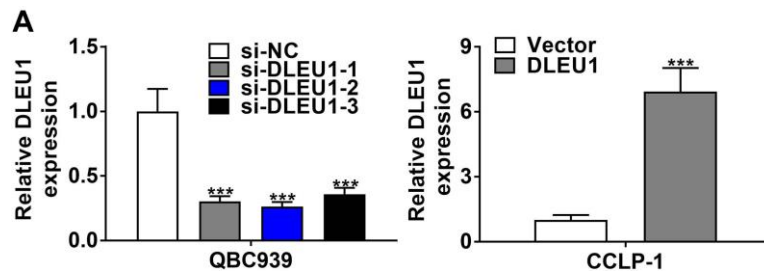

**Figure S1.** The efficiencies of DLEU1 siRNA and DLEU1 plasmid in CCA cells (*t*-test). \*\*\**p* < 0.001.

### Supporting Figure S2

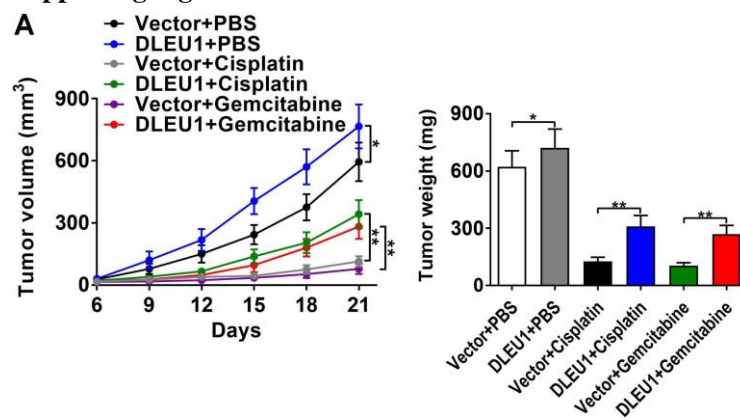

**Figure S2.** The tumor growth curve (two-way ANOVA) and tumor weight (*t*-test) of each groups were analysed. \**p* < 0.05, \*\**p* < 0.01.

### Supporting Figure S3

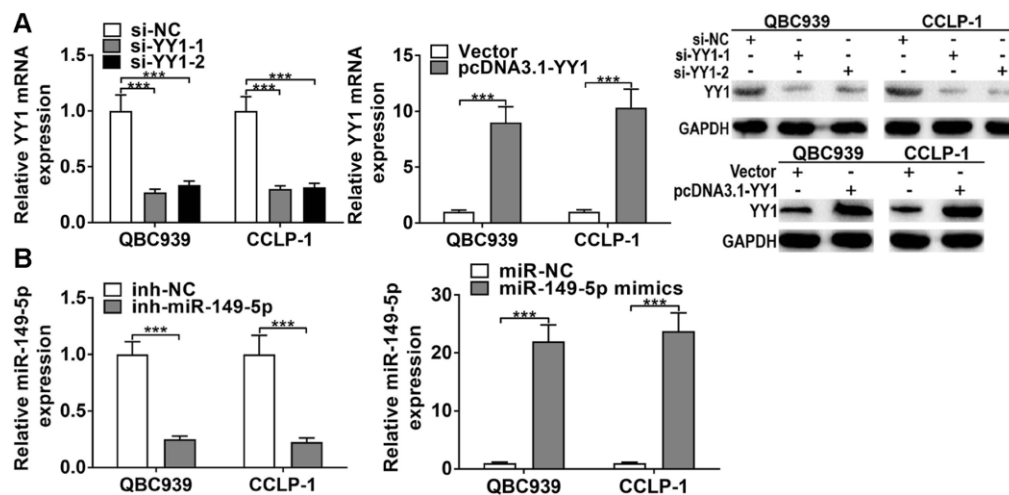

**Figure S3.** The knockdown efficiency and amplification efficiency. (A) The efficiencies of YY1 siRNA and YY1 plasmid in CCA cells (*t*-test). (B) The knockdown and amplification efficiencies of miR-149-5p in CCA cells (*t*-test). \*\*\**p* < 0.001.

## Supporting Figure S4

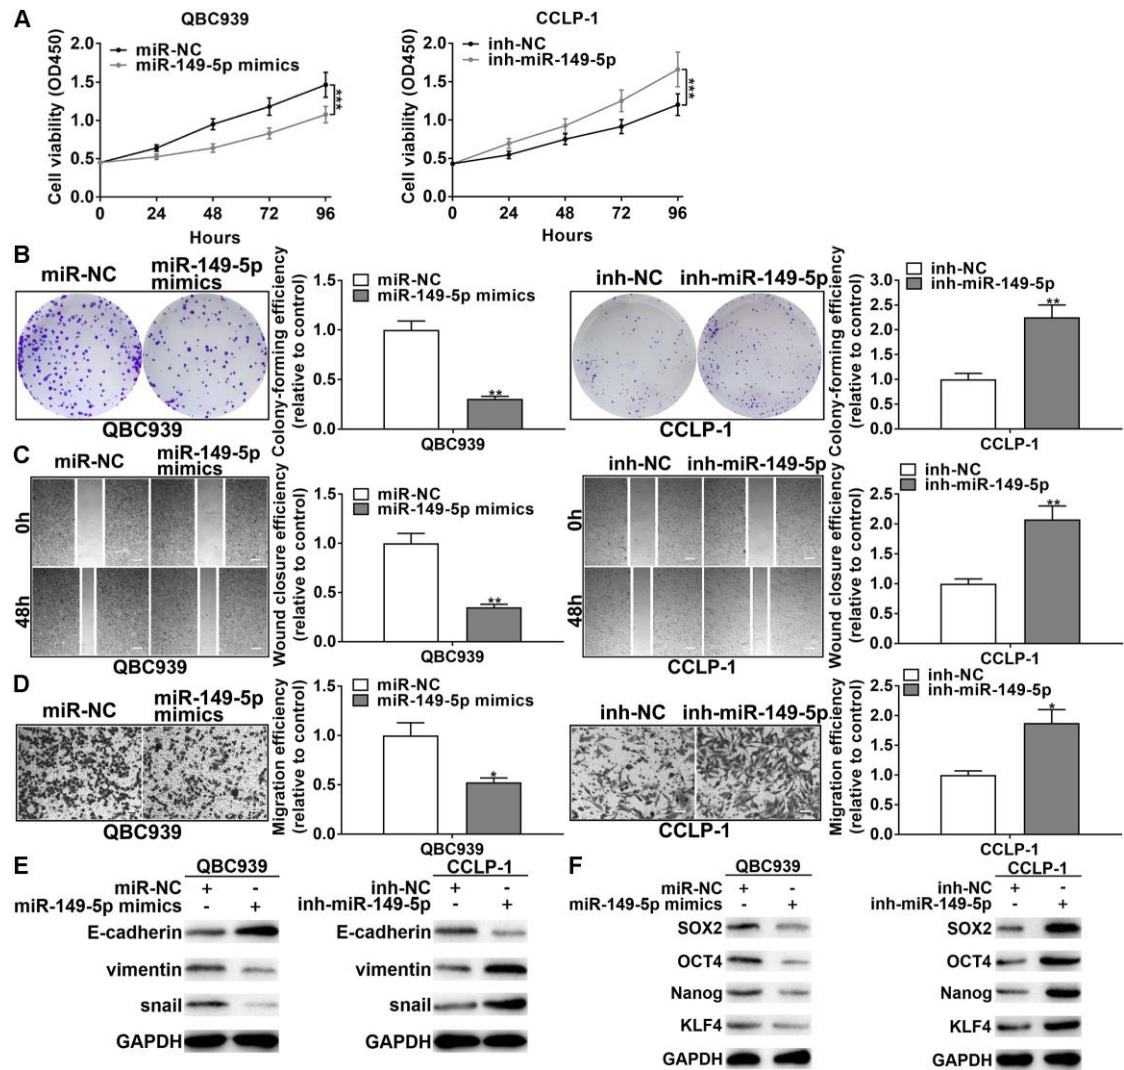

**Figure S4.** MiR-149-5p inhibited the proliferation, invasion and stemness maintenance of CCA cells. (A-B) The effects of miR-149-5p on CCA proliferation were detected by CCK-8 (two-way ANOVA) and colony formation assays (*t*-test). (C-D) The gain- and loss-of-function experiments about cell migration in QBC939 and CCLP-1 cells (*t*-test). (E) EMT-related proteins including E-cadherin, snail and vimentin were measured via western blot (two-way ANOVA). (F) The functions of miR-149-5p on stem markers (SOX2, OCT4, Nanog, KLF4) were detected by western blot (two-way ANOVA). The data were expressed as mean  $\pm$  SD of three independent experiments. \**p* < 0.05, \*\**p* < 0.01, \*\*\**p* < 0.001.

Supporting Figure S5

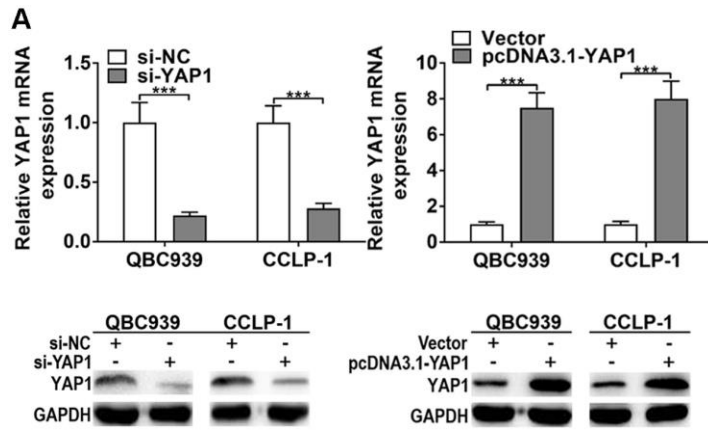

**Figure S5.** The knockdown efficiency of si-YAP1 and amplification efficiency of pcDNA3.1-YAP1 in QBC939 and CCLP-1 cells (*t*-test). \*\*\**p* < 0.001.

## Supporting Figure S6

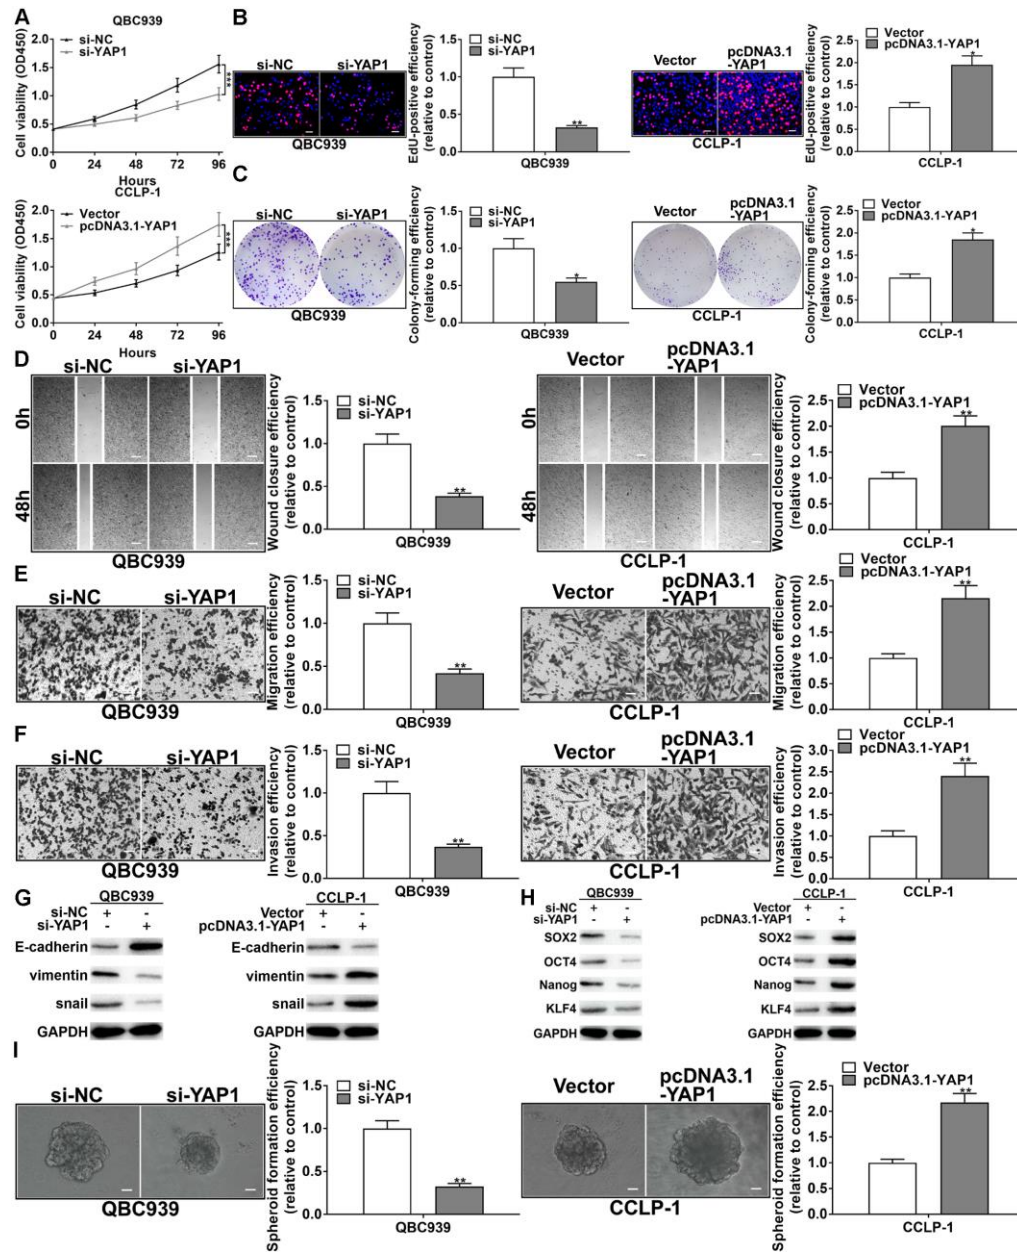

**Figure S6.** YAP1 promoted the proliferation, invasion and stemness maintenance of CCA cells. (A-C) Knocking down YAP1 suppressed QBC939 cell proliferation, whereas overexpressing YAP1 promoted CCLP-1 cell proliferation (two-way ANOVA and *t*-test). (D-G) The effects of YAP1 on CCA migration, invasion and EMT process were detected by wound healing (*t*-test), transwell (*t*-test) and western blot assays (two-way ANOVA). (H-I) The gain- and loss-of-function experiments of YAP1 on stemness maintenance in QBC939 and CCLP-1 cells were performed with spheroid formation assay (*t*-test) and stem marker analysis (two-way ANOVA). The data were expressed as mean  $\pm$  SD of three independent experiments. \**p* < 0.05, \*\**p* < 0.01, \*\*\**p* < 0.001.

## Supporting Figure S7

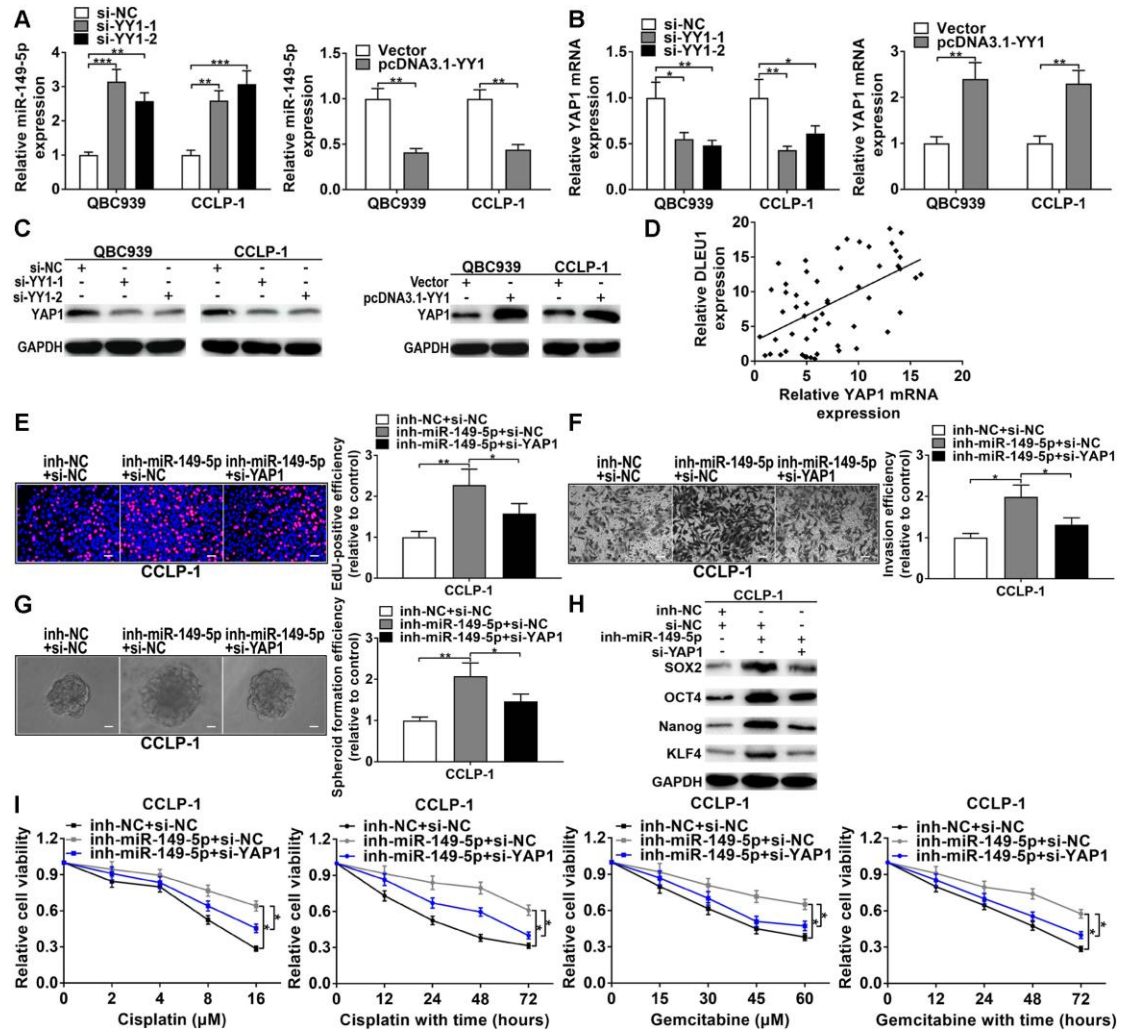

**Figure S7.** MiR-149-5p restrained CCA malignant progression by suppressing YAP1. (A) Silencing YY1 promoted miR-149-5p expression and upregulated YY1 inhibited miR-149-5p expression (*t*-test). (B-C) Silencing YY1 inhibited YAP1 expression and upregulated YY1 promoted YAP1 expression (*t*-test). (D) The correlation between DLEU1 and YAP1 was positively correlated (linear regression). (E-I) Rescue assays of EdU (*t*-test), transwell (*t*-test), spheroid formation (*t*-test), stem marker analysis (two-way ANOVA) and chemo-resistance (two-way ANOVA) confirmed that facilitation of proliferation, invasion, stemness maintenance and chemo-resistance induced by knocking down miR-149-5p was retrieved through silencing YAP1 in CCLP-1 cells, respectively. The data were expressed as mean  $\pm$  SD of three independent experiments. \**p* < 0.05, \*\**p* < 0.01, \*\*\**p* < 0.001.

## Supporting Figure S8

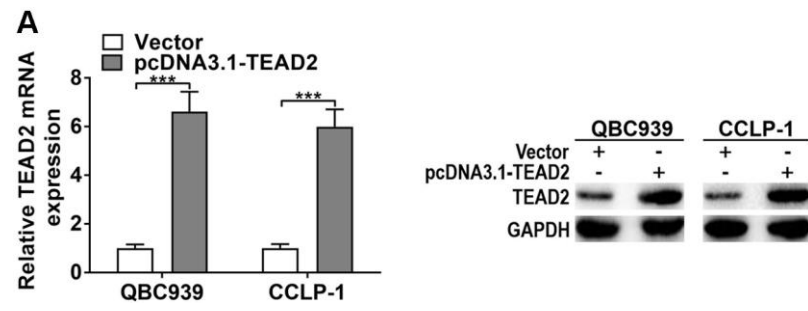

**Figure S8.** The amplification efficiency of pcDNA3.1-TEAD2 was analysed in CCA cells (*t*-test).

\*\*\* $p < 0.001$ .



## Supporting Table S1

**Table S1.** Primer sequences for qRT-PCR and sequences for siRNA.

| Nucleic acids            | Sequences                                                                                               |
|--------------------------|---------------------------------------------------------------------------------------------------------|
| DLEU1                    | Forward primer: 5'-TCAGAATGCCGACTCTATGCT-3'<br>Reverse primer: 5'-GGTGAGGACAGAGTTAAACGC-3'              |
| GAPDH                    | Forward primer: 5'-GGGAGCCAAAAGGGTCAT-3'<br>Reverse primer: 5'-GAGTCCTTCCACGATACCAA-3'                  |
| YY1                      | Forward primer: 5'-AGCAGAAGCAGGTGCAGATCAA-3'<br>Reverse primer: 5'-CTGCCAGTTGTTTGGGATCT-3'              |
| DLEU1 promoter E1 region | Forward primer: 5'-TTCAGGCTCTTACCGACTGC-3'<br>Reverse primer: 5'-GTCCGAGAGTATAGCGCCAC-3'                |
| DLEU1 promoter E2 region | Forward primer: 5'-AAGAAAAGGTGGGGATCGCA-3'<br>Reverse primer: 5'-GGGGCTTCGAGCTAACGATT-3'                |
| DLEU1 promoter E3 region | Forward primer: 5'-AGCCAATCAGGGGGTAACAAG-3'<br>Reverse primer: 5'-CACGCTTCTTTAGGACTGCC-3'               |
| U6                       | Forward primer: 5'-GCTTCGGCAGCACATATACTAAAAT-3'<br>Reverse primer: 5'-CGCTTCACGAATTTGCGTGTGCAT-3'       |
| miR-149-5p               | Forward primer: 5'-GGCTCTGGCTCCGTGTCTT-3'<br>Reverse primer: 5'-CAGTGCAGGGTCCGAGGTATT-3'                |
| miR-126-5p               | Forward primer: 5'-GGAATGTAAGGAAGTGTG-3'<br>Reverse primer: 5'-GAGCAGGCTGGAGAA-3'                       |
| miR-142-5p               | Forward primer: 5'-GAAGATCTCCAGCCACCTGTTTCA-3'<br>Reverse primer: 5'-CCGCTCGAGTAGTCCTTCACTTCATG-3'      |
| miR-24-3p                | Forward primer: 5'-GATCCTGGCTCAGTTCAGCAGGAACAGC-3'<br>Reverse primer: 5'-TCGAGCTGTTCTGCTGAACTGAGCCAG-3' |
| miR-421                  | Forward primer: 5'-CTCACTCACATCAACAGACATTAATT-3'<br>Reverse primer: 5'-TATGGTTGTTCTGCTCTCTGTGTC-3'      |
| miR-665                  | Forward primer: 5'-GGTCTACAAAGGGAAGC-3'<br>Reverse primer: 5'-TTTGGCACTAGCACATT-3'                      |
| miR-106a-5p              | Forward primer: 5'-GATGCTCAAAAAGTGCTTACAGTGCA-3'<br>Reverse primer: 5'-TATGGTTGTTCTGCTCTCTGTCTC-3'      |
| miR-320                  | Forward primer: 5'-AAATCAGGTTGCCGATCTTCA-3'<br>Reverse primer: 5'-GTGCAGGGTCCGAGGT-3'                   |
| miR-671-5p               | Forward primer: 5'-GCCCCAGGAAGCCCGAGGGGC-3'<br>Reverse primer: 5'-GTGCAGGGTCCGAGGT-3'                   |
| YAP1                     | Forward primer: 5'-TAGCCCTGCGTAGCCAGTTA-3'<br>Reverse primer: 5'-TCATGCTTAGTCCACTGTCTGT-3'              |
| SOX2                     | Forward primer: 5'-GCTACAGCATGATGCAGGACCA-3'<br>Reverse primer: 5'-TCTGCGAGCTGGTCATGGAGTT-3'            |
| TEAD1                    | Forward primer: 5'-GCCTCCCAACATCCATAGCA-3'<br>Reverse primer: 5'-TCTGTCCACCAGCCGAGATT-3'                |
| TEAD2                    | Forward primer: 5'-TGCCTTCTCCTGGTCAAGTTC-3'<br>Reverse primer: 5'-GGCTCTCATACTGGCTGCTCA-3'              |

|                      |                                                                                          |
|----------------------|------------------------------------------------------------------------------------------|
| TEAD3                | Forward primer: 5'-CATCGAGCAGAGCTTCCAG-3'<br>Reverse primer: 5'-CGTGCAATCAACTCATTTCG-3'  |
| TEAD4                | Forward primer: 5'-AGTCAGGCACTGGACAAGC-3'<br>Reverse primer: 5'-GCTGGAGACCTGCTTCCTG-3'   |
| SOX2 promoter region | Forward primer: 5'-CTTACCAAGGCCTGCTGGTT-3'<br>Reverse primer: 5'-AGGTGCCAACACTCTCTCAC-3' |
| si-DLEU1-1           | 5'-GCAGUCUGUUCUGAACAU-3'                                                                 |
| si-DLEU1-2           | 5'-CAACGGAAUGUAUCAUUGA-3'                                                                |
| si-DLEU1-3           | 5'-GAGGGGUCGUCUUAUAGCUAC-3'                                                              |
| si-YY1-1             | 5'-GAACUCACCUCCUGAUUAU-3'                                                                |
| si-YY1-2             | 5'-UGCAGAUGC UUUCUCAUAGCAGAGU-3'                                                         |
| si-YAP1              | 5'-AGAUACUUCUAAAUCACA-3'                                                                 |
| si-TEAD1             | 5'-GGCCGAUUUGUAUACCGAA-3'                                                                |
| si-TEAD2             | 5'-CGAAGGAAAUCAAGGGAAA-3'                                                                |
| si-TEAD3             | 5'-UACCUUGCUCUCAAUUCUGGAG-3'                                                             |
| si-TEAD4             | 5'-UUUCCUGCACACACGUCUCUU-3'                                                              |

*Note.* qRT-PCR, quantitative real-time polymerase chain reaction; DLEU1, deleted in lymphocytic leukemia 1; GAPDH, glyceraldehyde 3-phosphate dehydrogenase; YY1, Yin Yang 1; YAP1, Yes-associated protein 1; SOX2, SRY-box 2; TEAD, transcriptional enhanced associated domain.
